# Supplementary material for: Mesoporous polydopamine coated bismuth sulfide nanocomposites with great photothermal conversion, antibacterial and antioxidant performances
Source: Research Square preprint supplement (doi:10.21203/rs.3.rs-8017762/v1), 2025-11-24
Supplement: Supplementary file 1 [file d1a011adc5852c174574ba85.docx]

Supporting Information


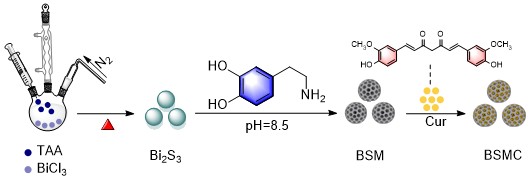


Fig. S1. Schematic diagram of synthesis of BSMC NPs





Fig. S2. SEM images of BSM NPs


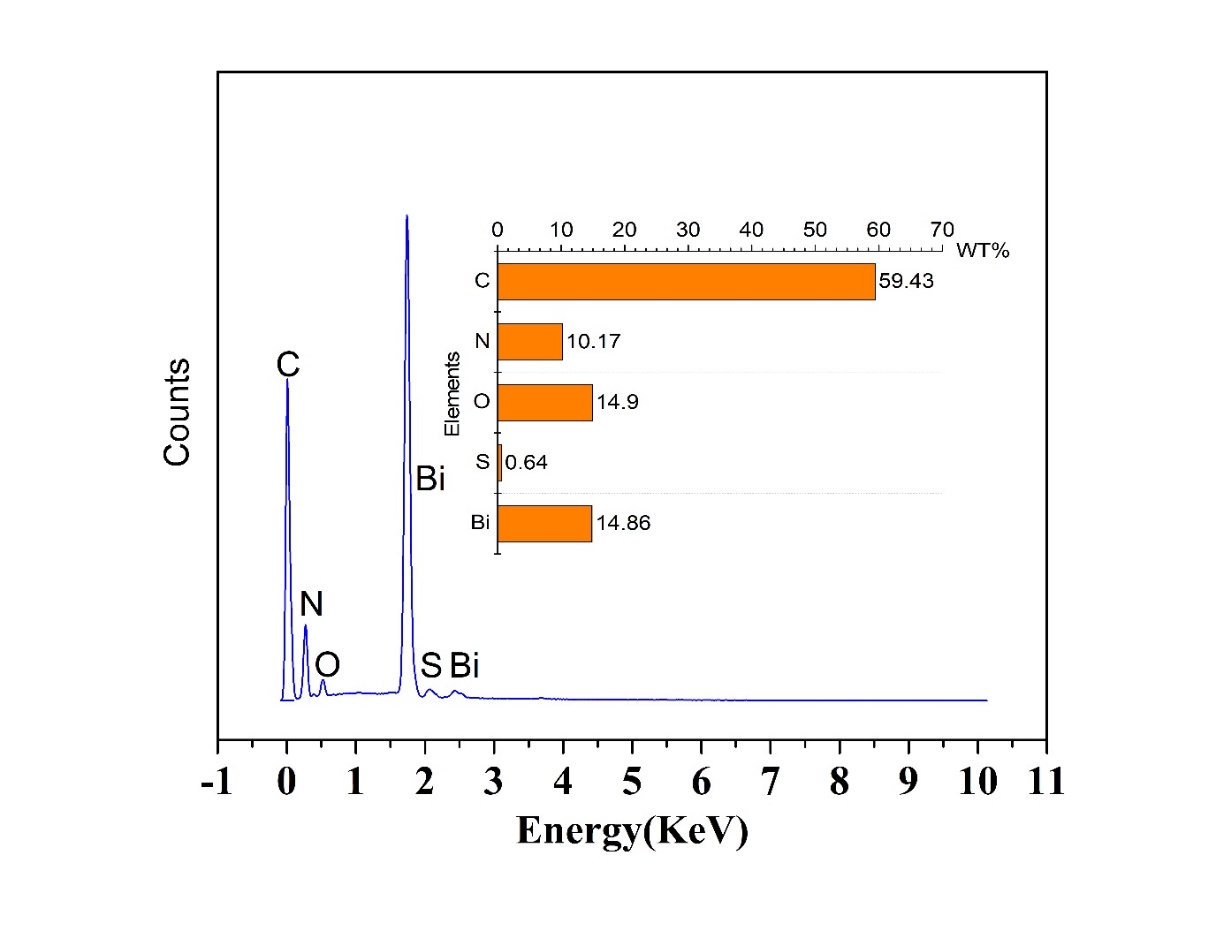


Fig. S3. Elemental analysis of BSMC NPs.


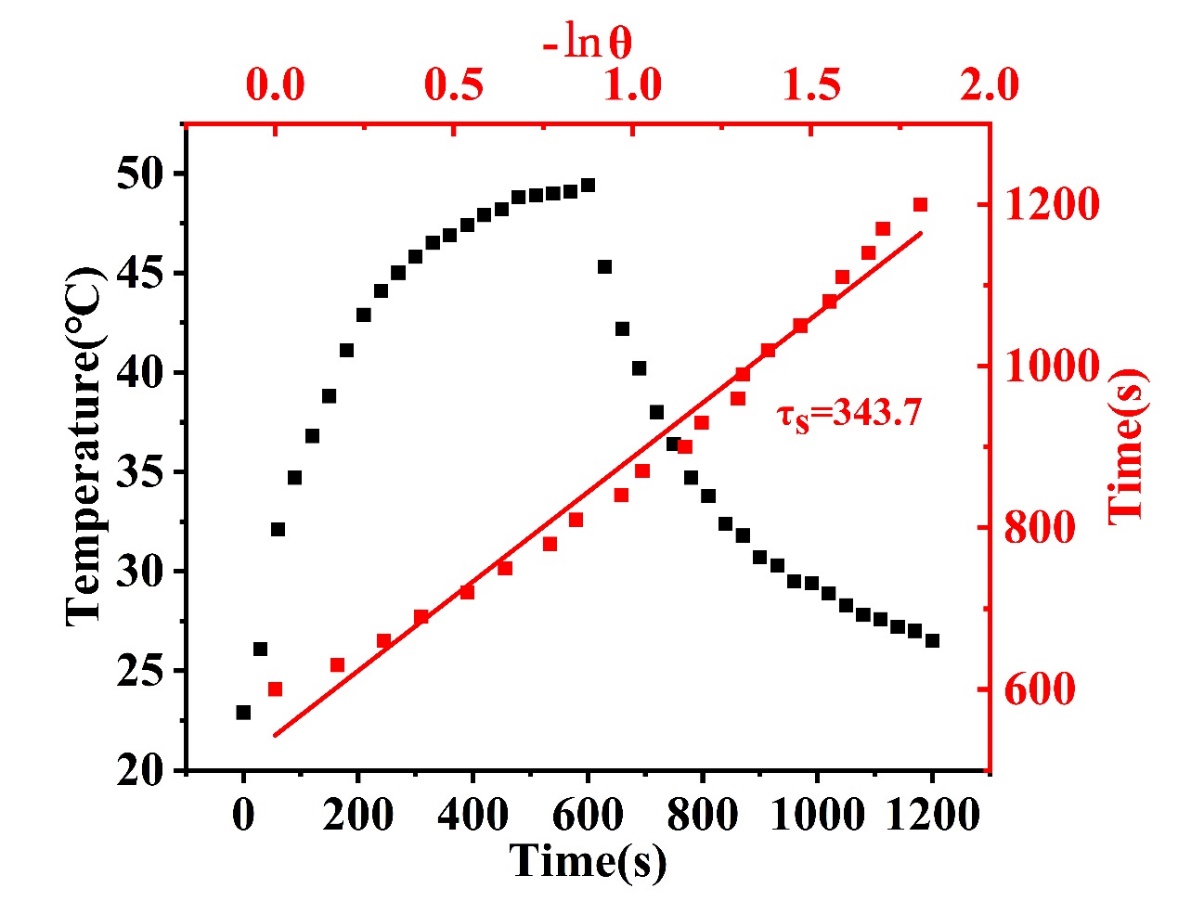


Fig. S4. Photothermal conversion efficiency of BSCM NPs.


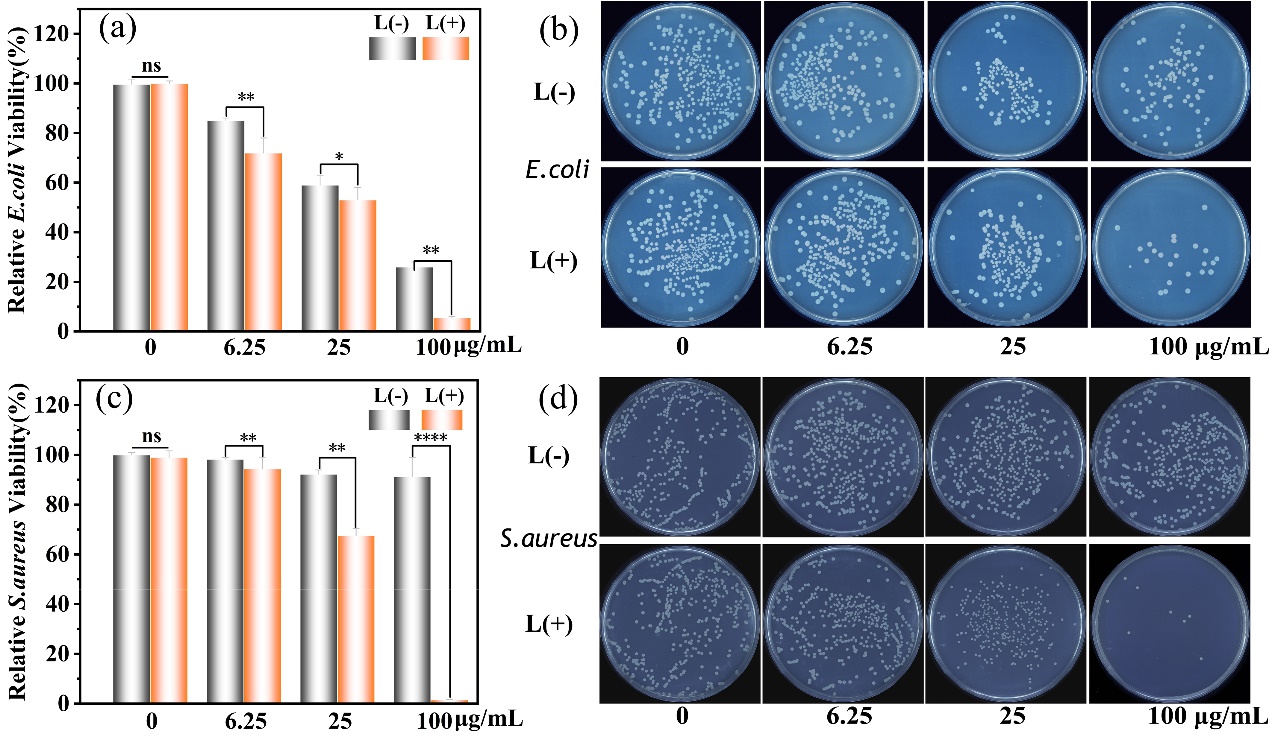


Fig. S5. Relative viability of *E. coli* (a) and *S. aureus* (c) incubated with BSMC with or without 808 nm laser irradiation. Photographs of bacterial colonies of *E. coli* (b) and *S. aureus* (d).


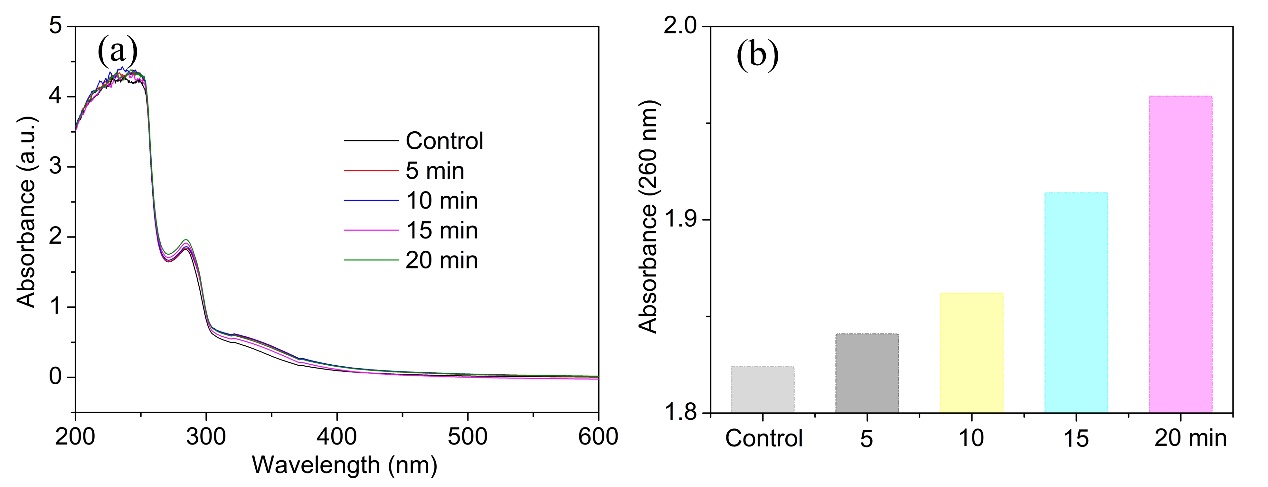


Fig. S6. Leak of cytoplasmic contents of *S. aureus*. (a) Absorption curve of cytoplasmic contents with different exposure times. (b) The intensity change in absorption at 260 nm.
